# Supplementary material for: Incidence of Air Leaks in Critically Ill Patients with Acute Hypoxemic Respiratory Failure Due to COVID-19
Source: MDPI journal article supplement (doi:10.3390/diagnostics13061156), 2023-03-17
Supplement: s1 [file s1]

## Article

# Incidence of Air Leaks in Critically Ill Patients with Acute Hypoxemic Respiratory Failure Due to COVID-19

Robin L. Goossen <sup>1,\*†</sup>, Mariëlle Verboom <sup>1,†</sup>, Mariëlle Blacha <sup>1</sup>, Illaa Smesseim <sup>2</sup>, Ludo F. M. Beenen <sup>3</sup>, David M. P. van Meenen <sup>1,4</sup>, Frederique Paulus <sup>1,5</sup> and Marcus J. Schultz <sup>1,6,7,\*</sup>  
and on behalf of the PRoVENT-COVID and PRoAcT-COVID Investigators <sup>‡</sup>

<sup>1</sup> Department of Intensive Care, Amsterdam University Medical Centers, Location ‘AMC’, 1105 AZ Amsterdam, The Netherlands

<sup>2</sup> Department of Thoracic Oncology, Antoni van Leeuwenhoek Ziekenhuis, 1066 CX Amsterdam, The Netherlands

<sup>3</sup> Department of Radiology, Amsterdam University Medical Centers, Location ‘AMC’, 1105 AZ Amsterdam, The Netherlands

<sup>4</sup> Department of Anesthesiology, Amsterdam University Medical Centers, Location ‘AMC’, 1105 AZ Amsterdam, The Netherlands

<sup>5</sup> ACHIEVE, Centre of Applied Research, Faculty of Health, Amsterdam University of Applied Sciences, 1091 GC Amsterdam, The Netherlands

<sup>6</sup> Mahidol–Oxford Tropical Medicine Research Unit (MORU), Mahidol University, Bangkok 10400, Thailand

<sup>7</sup> Nuffield Department of Medicine, University of Oxford, Oxford OX3 7BN, UK

\* Correspondence: r.l.goossen@amsterdamumc.nl (R.L.G.); marcus.j.schultz@gmail.com (M.J.S.)

† These authors contributed equally to this work.

‡ A full list of the collaborative investigators is provided Acknowledgments.

## Supplementary

**Table S1.** Amount of missing data in Table 1.

|                              | <b>Patients with<br/>air leak<br/>(N = 13)</b> | <b>Patients without<br/>air leak<br/>(N = 143)</b> |
|------------------------------|------------------------------------------------|----------------------------------------------------|
| Age, years                   | 0 (0.0)                                        | 0 (0.0)                                            |
| Sex, male                    | 0 (0.0)                                        | 0 (0.0)                                            |
| BMI, kg/m <sup>2</sup>       | 2 (15)                                         | 24 (16.8)                                          |
| SOFA score                   | 4 (30.8)                                       | 32 (22.4)                                          |
| Medical History              |                                                |                                                    |
| COPD                         | 0 (0.0)                                        | 0 (0.0)                                            |
| asthma                       | 0 (0.0)                                        | 0 (0.0)                                            |
| lung emphysema               | 0 (0.0)                                        | 0 (0.0)                                            |
| interstitial lung disease    | 0 (0.0)                                        | 0 (0.0)                                            |
| active smoker                | 7 (53.8)                                       | 66 (46.2)                                          |
| history of smoking           | 8 (61.5)                                       | 69 (48.3)                                          |
| previous pneumothorax        | 0 (0.0)                                        | 0 (0.0)                                            |
| Home medication              |                                                |                                                    |
| Ace inhibitors               | 1 (7.7)                                        | 28 (19.6)                                          |
| Angiotensin receptor blocker | 1 (7.7)                                        | 28 (19.6)                                          |
| Ventilatory Support          |                                                |                                                    |
| with invasive ventilation    | 0 (0.0)                                        | 0 (0.0)                                            |
| FiO <sub>2</sub> , %         | 0 (0.0)                                        | 3 (2.1)                                            |
| V <sub>T</sub> mL/kg PBW     | 2 (15.4)                                       | 41 (28.7)                                          |
| PEEP, cm H <sub>2</sub> O    | 0 (0.0)                                        | 15 (10.5)                                          |
| Pmax, cm H <sub>2</sub> O    | 0 (0.0)                                        | 15 (10.5)                                          |

|                                                 | Patients with<br>air leak<br>(N = 13) | Patients without<br>air leak<br>(N = 143) |
|-------------------------------------------------|---------------------------------------|-------------------------------------------|
| C <sub>RS</sub> , mL/cmH <sub>2</sub> O         | 5 (38.5)                              | 52 (36.4)                                 |
| with high flow nasal oxygen                     | 0 (0.0)                               | 0 (0.0)                                   |
| FiO <sub>2</sub> , %                            | N.A.                                  | 0 (0.0)                                   |
| flow, L O <sub>2</sub> /min                     | N.A.                                  | 0 (0.0)                                   |
| Horowitz index                                  |                                       |                                           |
| PaO <sub>2</sub> /FiO <sub>2</sub>              | 0 (0.0)                               | 2 (1.4)                                   |
| PaO <sub>2</sub> /FiO <sub>2</sub> > 300 mmHg   | N.A.                                  | N.A.                                      |
| PaO <sub>2</sub> /FiO <sub>2</sub> 200–300 mmHg | N.A.                                  | N.A.                                      |
| PaO <sub>2</sub> /FiO <sub>2</sub> 100–200 mmHg | N.A.                                  | N.A.                                      |
| PaO <sub>2</sub> /FiO <sub>2</sub> < 100mmHg    | N.A.                                  | N.A.                                      |

Data are N (%)

**Table S2.** Amount of missing data in Table 3.

|                                       | Patients with<br>air leak<br>(N = 13) | Patients without<br>air leak<br>(N = 143) |
|---------------------------------------|---------------------------------------|-------------------------------------------|
| Duration of respiratory support, days | 0 (0.0)                               | 0 (0.0)                                   |
| ICU length of stay, days              | 0 (0.0)                               | 0 (0.0)                                   |
| ICU mortality                         | 0 (0.0)                               | 0 (0.0)                                   |
| 28-day mortality                      | 0 (0.0)                               | 0 (0.0)                                   |
| 90-day mortality                      |                                       |                                           |

Data are N (%)

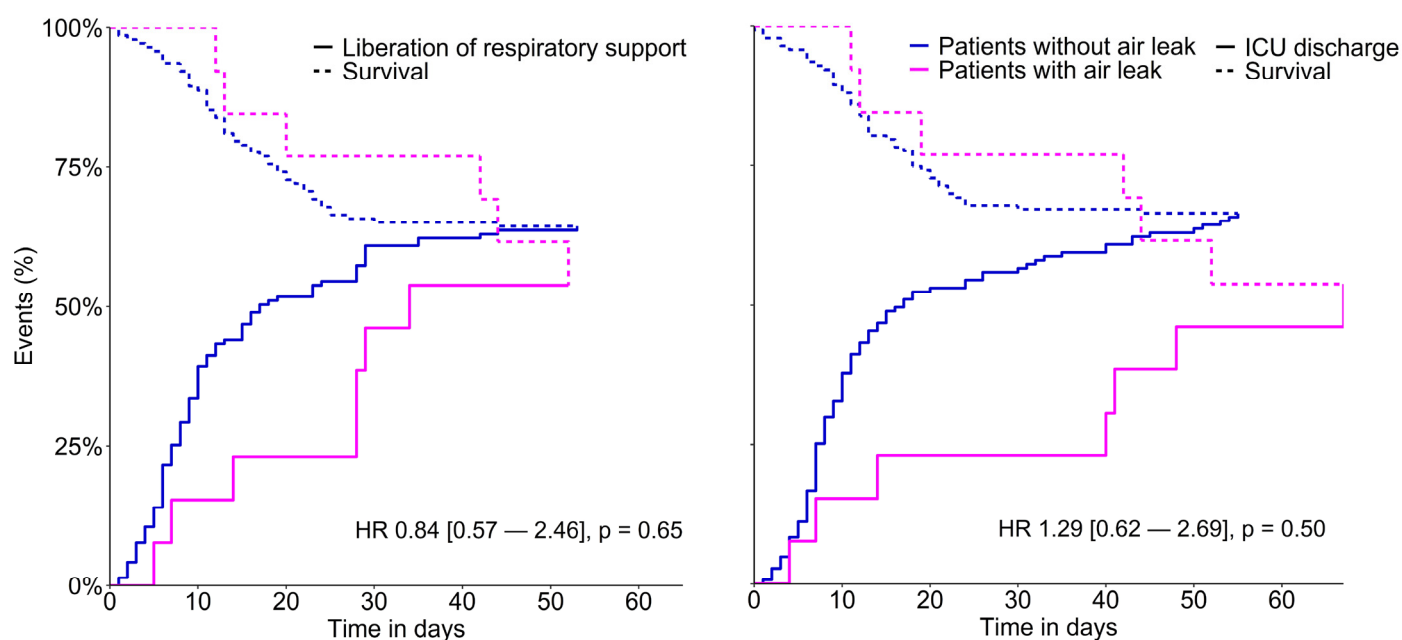

**Figure S1. Liberation of ventilation and ICU discharge.**

Cumulative incidence of liberation of respiratory support (left panel) and ICU discharge (right panel) with death as a competing risk, in patients with and without an air leak.
